# Supplementary material
Source: PubMed Central journal article supplement (PMC4902596)
Supplement: supp_pp.16.00110_PP2016-00110DR2_Supplemental_Material.pdf [file supp_pp.16.00110_PP2016-00110DR2_Supplemental_Material.pdf]

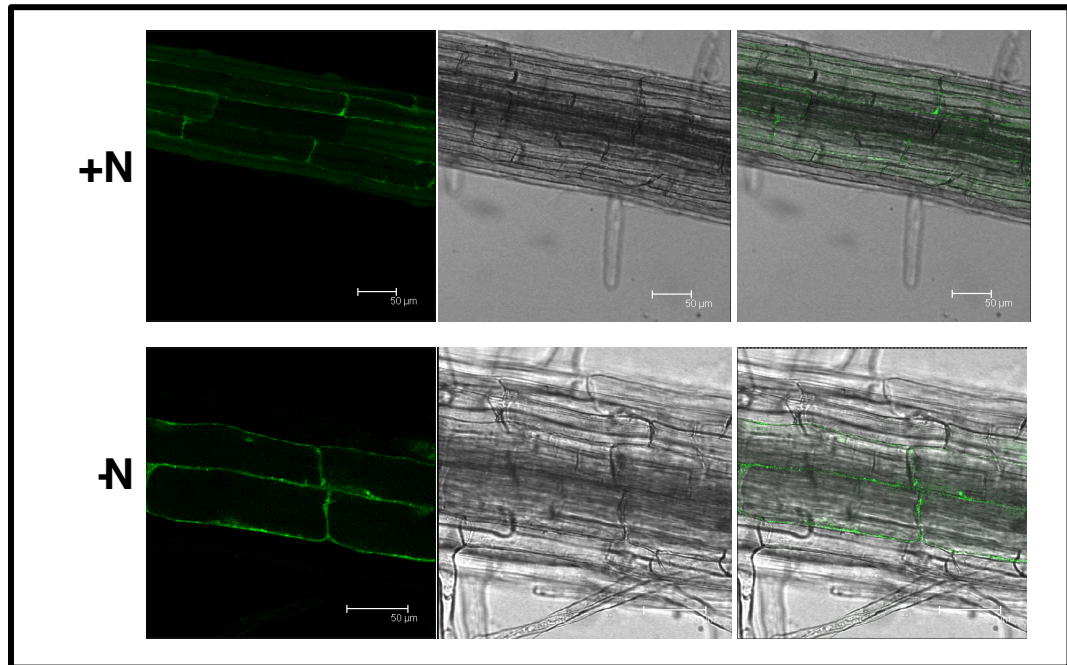

**Figure S1.** Autophagy induced by nitrogen starvation in *Arabidopsis* roots. Wild type seedlings expressing GFP-ATG8a fusion were grown for 7 days on N-rich medium and then transferred to the same medium (+N), or to a N-deficient medium (-N) 4 additional days. The root cells were visualized by confocal fluorescence microscopy. Representative images of fluorescence, visible and overlaid of both are shown.

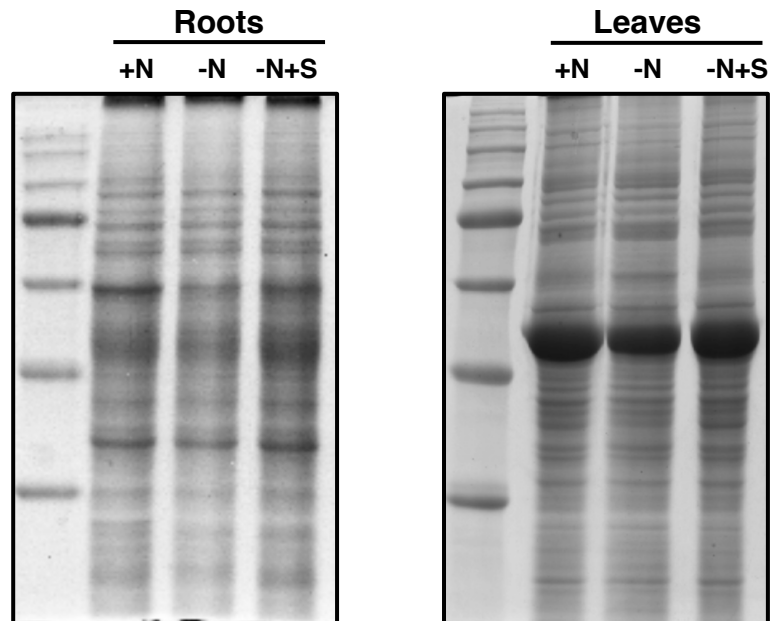

**Figure S2.** Representative SDS-PAGE of protein extracts. Wild type seedlings expressing the GFP-ATG8a fusion were grown for 7 days on N-rich medium and then transferred to the same medium (+N), to a N-deficient medium (-N), or to a N-deficient medium containing 200  $\mu$ M NaHS for 4 additional days. Root (20 mg) and leaf (100 mg) plant materials were ground separately in liquid nitrogen with 100 and 300  $\mu$ l of extraction buffer, respectively, as described in Materials and Methods, and 10  $\mu$ l of the final supernatant fractions were electrophoresed in 10 % acrylamide gels and stained with Coomassie Brilliant Blue.

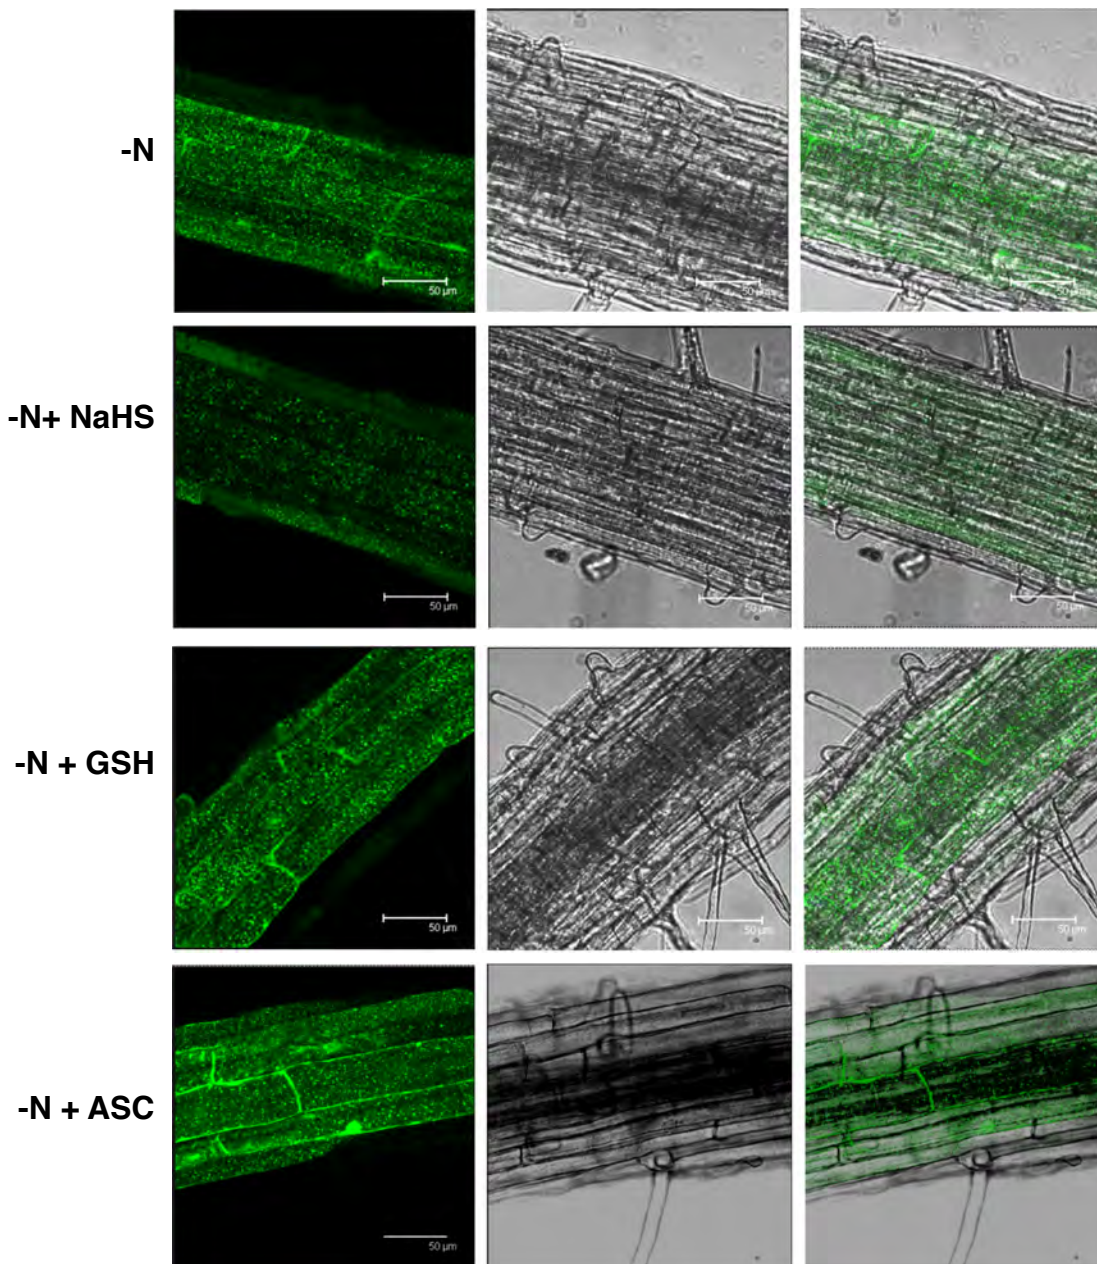

**Figure S3.** Representative single optical section of fluorescence, visible and overlaid images visualized by confocal microscopy of the root cells corresponding to the experiment described in Figure 5.

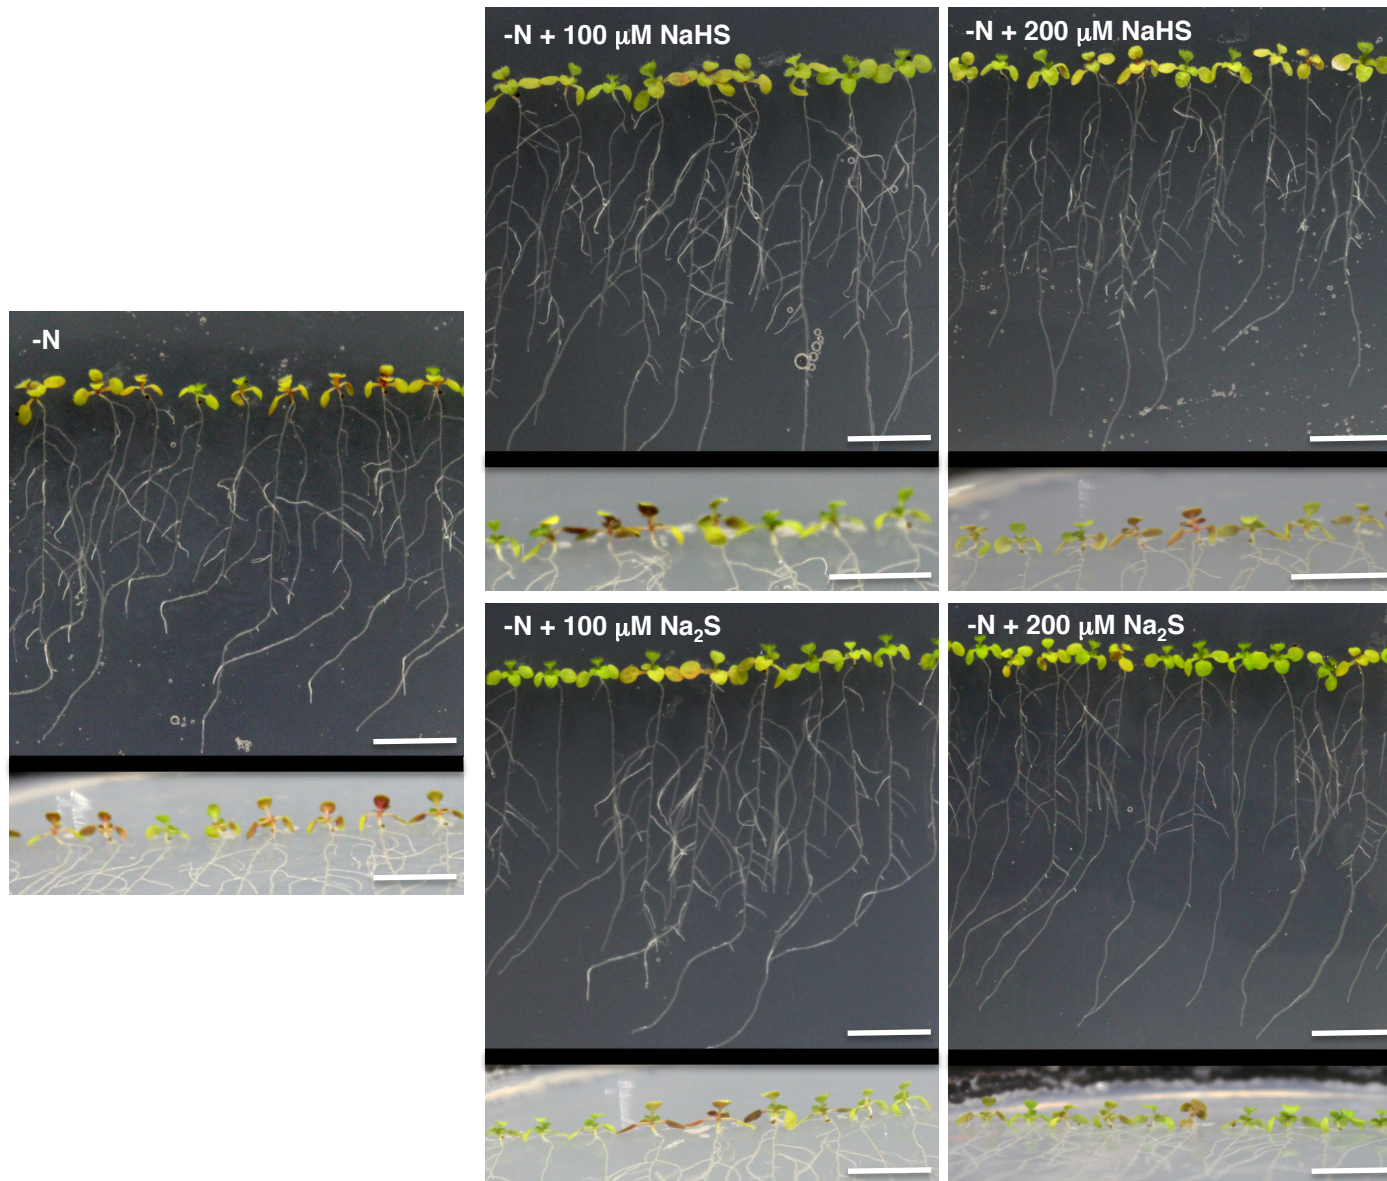

**Figure S4.** Phenotypes of the wild type seedlings expressing GFP-ATG8a under different conditions. Representative bright field images of 7-day-old wild-type grown on N-rich medium and then transferred to a N-deficient medium (-N) or to the N-deficient medium containing NaHS or Na<sub>2</sub>S at 100 or 200  $\mu\text{M}$  for 6 additional days. Lower panels show images of the abaxial part of the leaves. Bars = 1 cm

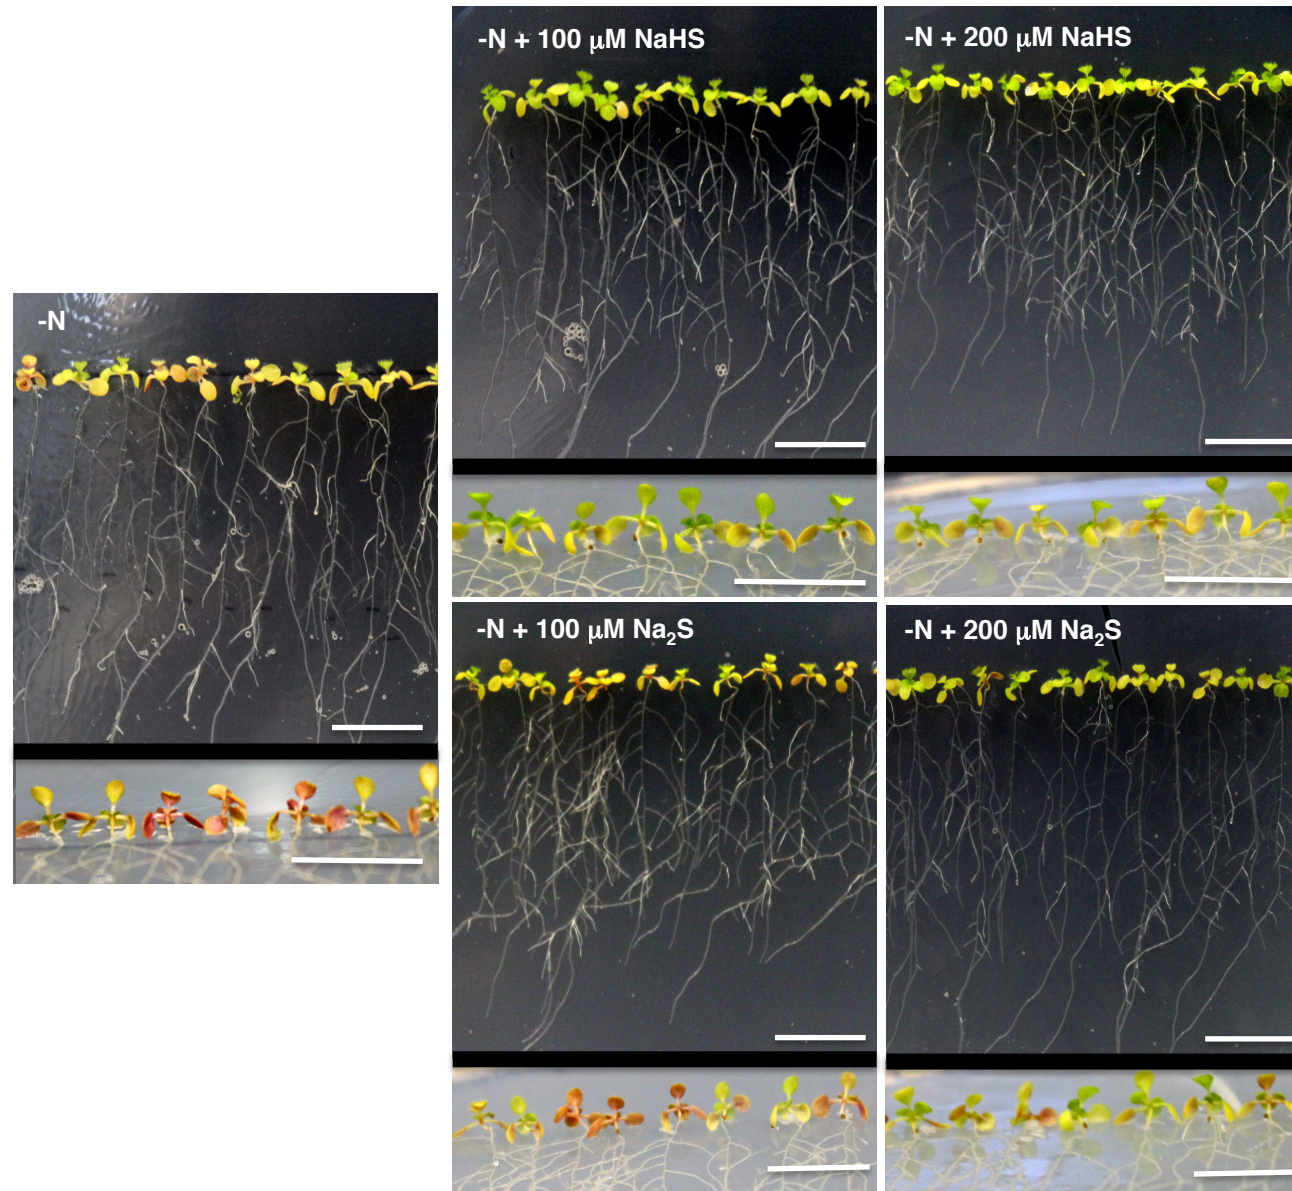

**Figure S5.** Phenotypes of the wild type seedlings expressing GFP-ATG8a under different conditions. Representative bright field images of 7-day-old wild-type grown on N-rich medium and then transferred to a N-deficient medium (-N) or to the N-deficient medium containing NaHS or Na<sub>2</sub>S at 100 or 200 μM for 8 additional days. Lower panels show images of the abaxial part of the leaves. Bars = 1 cm

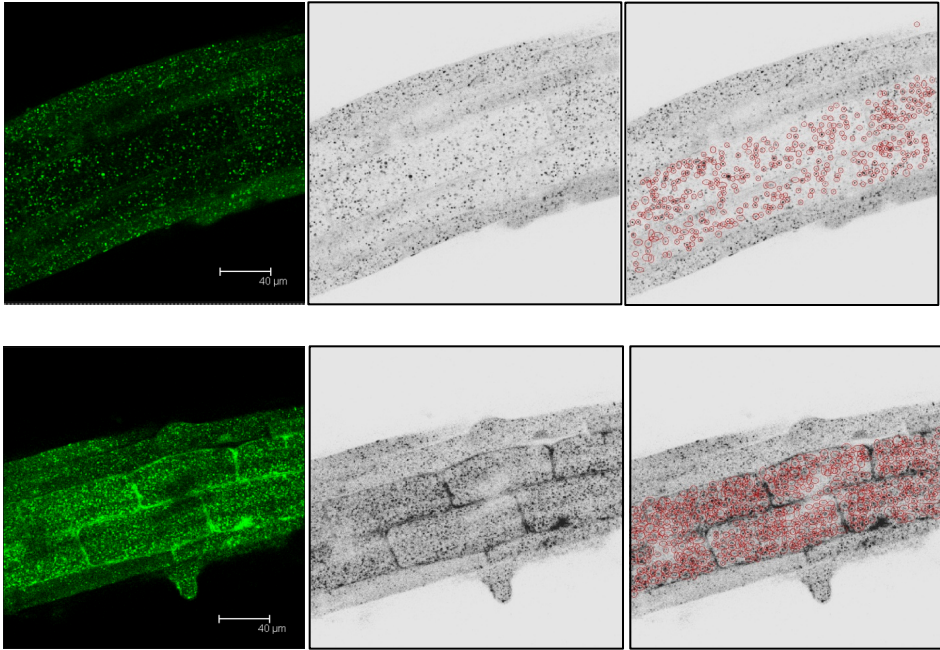

**Figure S6.** Image processing with PDQuest software (Bio-Rad). Two representative fluorescence confocal images were subjected to PDQuest software. The black and white images were automatically generated, and the images with selected spots are shown.

**Table S1.** Protein concentration of root extracts. Wild type seedlings expressing the GFP-ATG8a fusion were grown for 7 days on N-rich medium and then transferred to the same medium (+N), to a N-deficient medium (-N), or to a N-deficient medium containing 200  $\mu$ M NaHS for 4 additional days. 20 mg of plant root materials were ground in liquid nitrogen with 100  $\mu$ l of extraction buffer as described in Materials and Methods. The total amount of protein in the resulting supernatant was determined using a previously described method (Bradford, 1976). Individual experiments and the average data together with the percentages relatives to the +N sample protein concentration in parentheses are shown.

| Experiment     | Protein Extract (mg/ml) |                      |                      |
|----------------|-------------------------|----------------------|----------------------|
|                | +N                      | -N                   | -N + NaHS            |
| 1              | 2.32 (100)              | 1.59 (68)            | 2.57 (111)           |
| 2              | 1.19 (100)              | 0.96 (80)            | 1.28 (107)           |
| 3              | 2.26 (100)              | 1.68 (74)            | 2.02 (89)            |
| 4              | 2.11 (100)              | 1.08 (51)            | 1.27 (60)            |
| 5              | 1.39 (100)              | 0.59 (42)            | 0.95 (68)            |
| 6              | 2.23 (100)              | 1.44 (64)            | 1.69 (76)            |
| <b>Average</b> | 1.92 $\pm$ 0.49 (100)   | 1.22 $\pm$ 0.42 (64) | 1.63 $\pm$ 0.59 (85) |
